# Supplementary material
Source: PubMed Central journal article supplement (PMC5362737)
Supplement: ac6b01167_si_001.pdf [file ac6b01167_si_001.pdf]

# **Understanding the complexity of porous graphitic carbon (PGC) chromatography: Modulation of mobile-stationary phase interactions overcomes loss of retention and reduces variability**

Tashinga E. Bapiro\*, Frances M. Richards and Duncan I. Jodrell

Cancer Research UK Cambridge Institute, University of Cambridge, Li Ka Shing Centre, Box 278, Robinson Way, Cambridge, CB2 0RE, UK.

\* Current address: Oncology iMED DMPK, AstraZeneca UK Ltd, Cambridge Science Park, Milton Road, Cambridge CB4 0WG.

## **Supporting Information**

### **Contents:**

Figure S1. Gradient elution program from our previously published method<sup>1</sup>.

Figure S2. Effect on retention and peak shape of changing from an isocratic mobile phase of 95% methanol to 10mM ammonium acetate pH 10 in 95% methanol.

Figure S3. Effect on retention and peak shape of reducing methanol concentration.

Figure S4. Typical chromatogram and average retention from a C18 column.

Table S1. Average retention times and number of runs on PGC as reported by others.

Table S2. Average retention times on different PGC columns (age/usage) and the same column after regeneration, as reported by others.

Table S3. Average retention times of gemcitabine and metabolites on PGC when water replaces 95% methanol in the column maintenance step.

Supporting references.

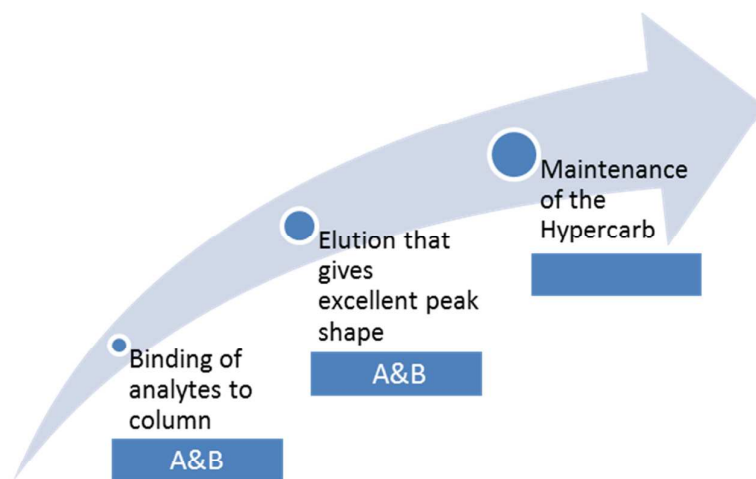

| Time (min) | A  | B  |  |
|------------|----|----|--|
| 0          | 95 | 5  |  |
| 2          | 95 | 5  |  |
| 2.2        | 80 | 20 |  |
| 7.8        | 80 | 20 |  |
| 8.0        | 95 | 5  |  |
| 15         | 95 | 5  |  |
|            |    |    |  |

**Figure S-1.** Our previously published<sup>1</sup> gradient elution program on Hypercarb™, A: 10 mM ammonium acetate pH10 in water, B: 100% acetonitrile. Showing the absence of a column maintenance step.

(A)

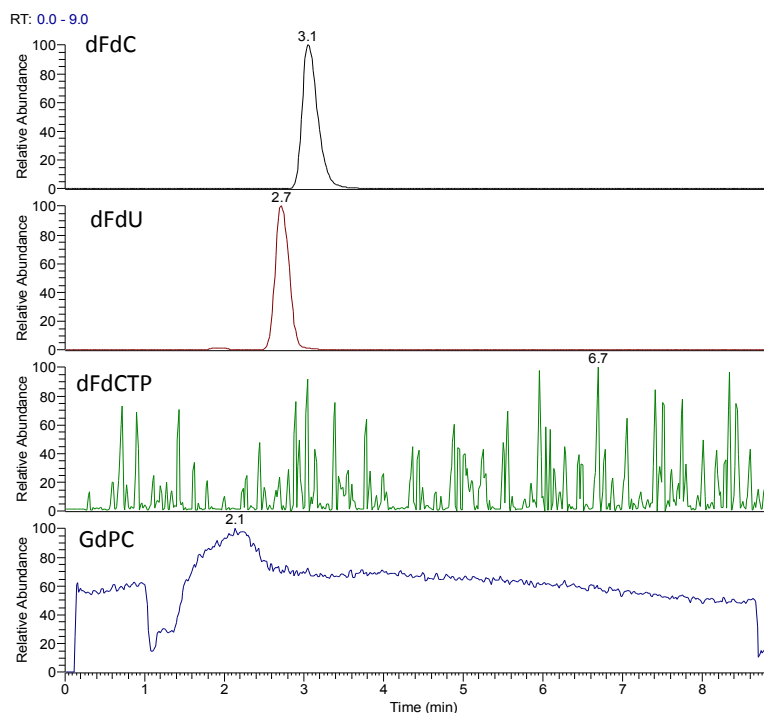

(B)

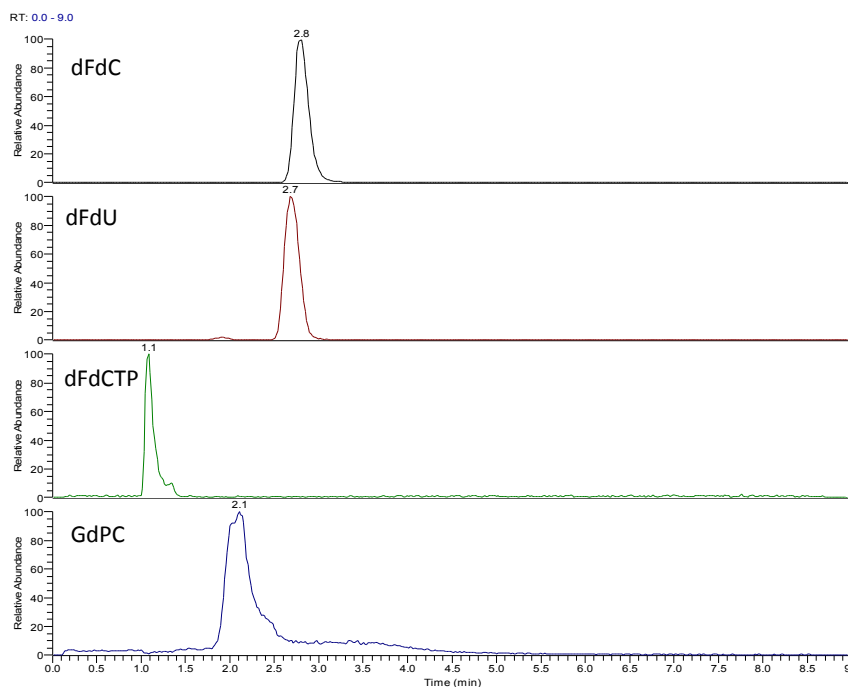

**Figure S-2.** Effect on retention and peak shape of changing from a mobile phase of (A) methanol:water (95:5) to (B) 10 mM ammonium acetate pH 10 in methanol:water (95:5). Analytes were detected following heated electrospray ionisation using a triple stage quadrupole mass spectrometer.

(A)

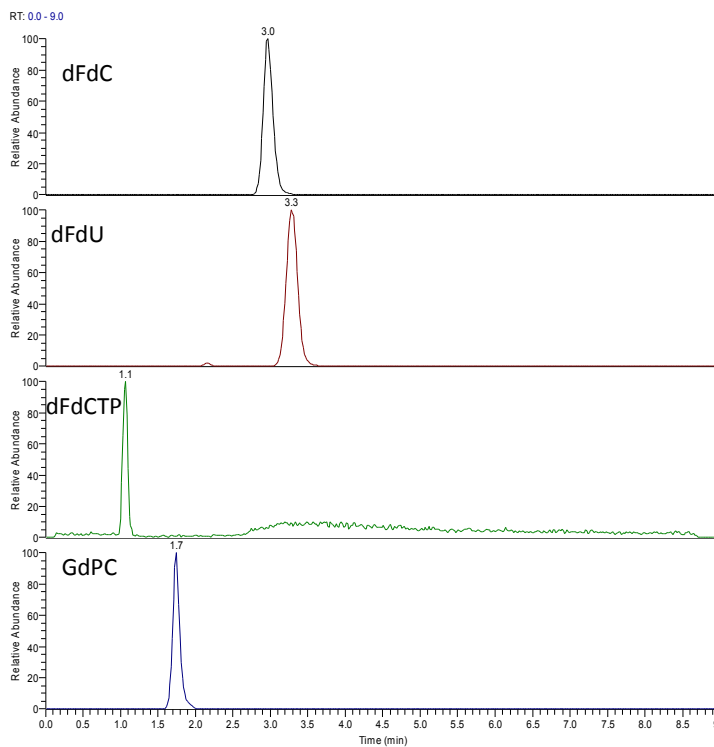

(B)

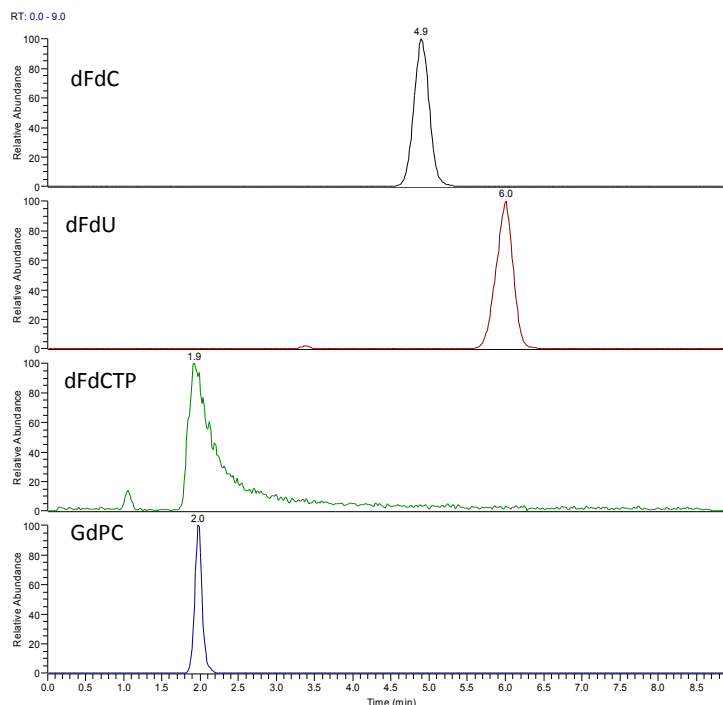

**Figure S-3.** Effect on retention and peak shape of changing from (A) 10 mM ammonium acetate pH 10 in methanol:water (70:30) to (B) 10 mM ammonium acetate pH 10 in methanol:water (1:1). Analytes were detected following heated electrospray ionisation using a triple stage quadrupole mass spectrometer.

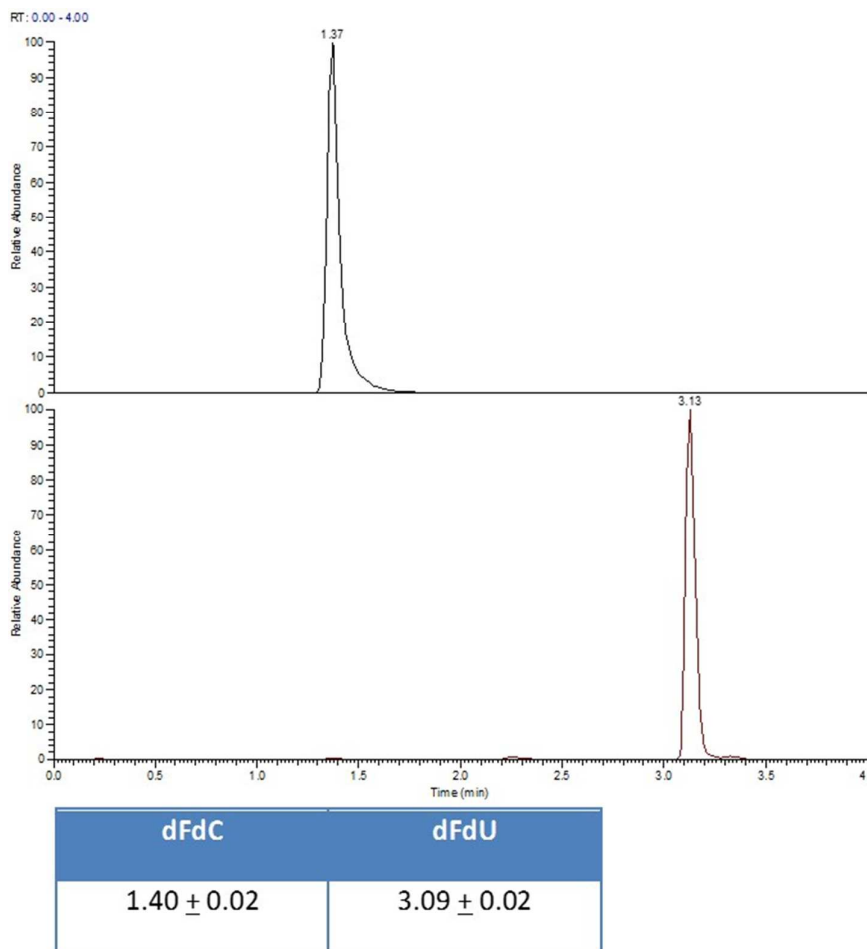

**Figure S-4.** Typical chromatogram on the Acquity T3 (C18) column, of dFdC and dFdU, 200 ng/ml spiked in water, detected following heated electrospray ionisation using a triple stage quadrupole mass spectrometer. The average retention time ( $t_R$  (min)) and standard deviation are shown for 95 injections of dFdC and dFdU.

| Compound                                        | t <sub>R</sub> (min) | Reference    |
|-------------------------------------------------|----------------------|--------------|
| Cytidine-5'-monophospho-N-acetylneuraminic acid | 1.9 ± 0.06 (N = 10)  | <sup>2</sup> |
| Uridine 5'-diphosphoglucose                     | 2.3 ± 0.08 (N = 10)  | <sup>2</sup> |
| Uridine 5'-diphosphogalactose                   | 2.6 ± 0.09 (N = 10)  | <sup>2</sup> |
| Guanosine 5'-diphospho-β-L-fucose               | 5.9 ± 0.15 (N = 10)  | <sup>2</sup> |
| Guanosine 5'-diphospho-D-mannose                | 4.8 ± 0.15 (N = 10)  | <sup>2</sup> |
| Uridine 5'-diphospho-N-acetylneuraminic acid    | 2.3 ± 0.09 (N = 10)  | <sup>2</sup> |
|                                                 |                      |              |
|                                                 |                      |              |
|                                                 |                      |              |

**Table S-1** Average retention times (t<sub>R</sub>) and standard deviation (N= number of runs) on PGC reported by others.

| Compound                    | t <sub>R</sub> (min) |          |          | Reference      |
|-----------------------------|----------------------|----------|----------|----------------|
|                             | Column 1             | Column 2 | Column 3 |                |
| Uridine 5'-diphosphoglucose | 11.76                | 10.40    | 8.20     | <sup>3</sup>   |
| gemcitabine                 | 7.75                 | 5.02*    |          | <sup>4,5</sup> |
| Gemcitabine triphosphate    | 6.89                 | 8.32*    |          | <sup>4,5</sup> |

**Table S-2** Average retention times (t<sub>R</sub>) on different (age/usage) or the same (after re-generation) PGC columns, as reported by others.

\*- not clear whether this was the same or different column but these are the retention times after treating the column with hydrogen peroxide<sup>4,6</sup>

Column number: 10170107

| dFdC        | dFdU        | GdPC        | dFdCTP      |
|-------------|-------------|-------------|-------------|
| 5.23 ± 0.02 | 5.04 ± 0.02 | 4.11 ± 0.02 | 3.93 ± 0.03 |

Column number: 0610524V6

| dFdC        | dFdU        | GdPC        | dFdCTP      |
|-------------|-------------|-------------|-------------|
| 5.16 ± 0.02 | 5.02 ± 0.02 | 4.07 ± 0.02 | 3.89 ± 0.02 |

Column number: 10065922

| dFdC        | dFdU        | GdPC        | dFdCTP      |
|-------------|-------------|-------------|-------------|
| 5.30 ± 0.01 | 5.21 ± 0.01 | 4.13 ± 0.02 | 3.93 ± 0.01 |

**Table S-3.** Average retention times ( $t_R$  (min)) and standard deviation of 18 injections of dFdC and metabolites extracted from tumour homogenate on 3 different PGC columns using the gradient shown in Figure 1 but with 100% water instead of methanol:water (95:5) used as solution "C" for flushing in the column maintenance step.

## References

- (1) Bapiro, T. E.; Richards, F. M.; Goldgraben, M. A.; Olive, K. P.; Madhu, B.; Frese, K. K.; Cook, N.; Jacobetz, M. A.; Smith, D. M.; Tuveson, D. A.; Griffiths, J. R.; Jodrell, D. I. *Cancer Chemother Pharmacol* **2011**, *68*, 1243-1253.
- (2) Garcia, A. D.; Chavez, J. L.; Mechref, Y. *Rapid communications in mass spectrometry : RCM* **2013**, *27*, 1794-1800.
- (3) Pabst, M.; Grass, J.; Fischl, R.; Leonard, R.; Jin, C.; Hinterkorn, G.; Borth, N.; Altmann, F. *Anal Chem* **2010**, *82*, 9782-9788.
- (4) Jansen, R. S.; Rosing, H.; Schellens, J. H.; Beijnen, J. H. *J Chromatogr A* **2009**, *1216*, 3168-3174.
- (5) Jansen, R. S.; Rosing, H.; Schellens, J. H.; Beijnen, J. H. *Rapid Commun Mass Spectrom* **2009**, *23*, 3040-3050.
- (6) Jansen, R. S.; Rosing, H.; Schellens, J. H.; Beijnen, J. H. *Mass spectrometry reviews* **2011**, *30*, 321-343.
